# Supplementary material for: Diagnosis and Treatment of Bacterial Pneumonia in Critically Ill Patients with COVID-19 Using a Multiplex PCR Assay: A Large Italian Hospital’s Five-Month Experience
Source: PubMed Central journal article supplement (PMC8579927; doi:10.1128/spectrum.00695-21), 2021-11-10

**FIG S1** Flowchart of patients and their lower respiratory tract samples included in the study. Standard-of-care testing (SoC) methods consisted of both culture-based identification and antimicrobial susceptibility testing, which were used as the reference method for comparison purposes.

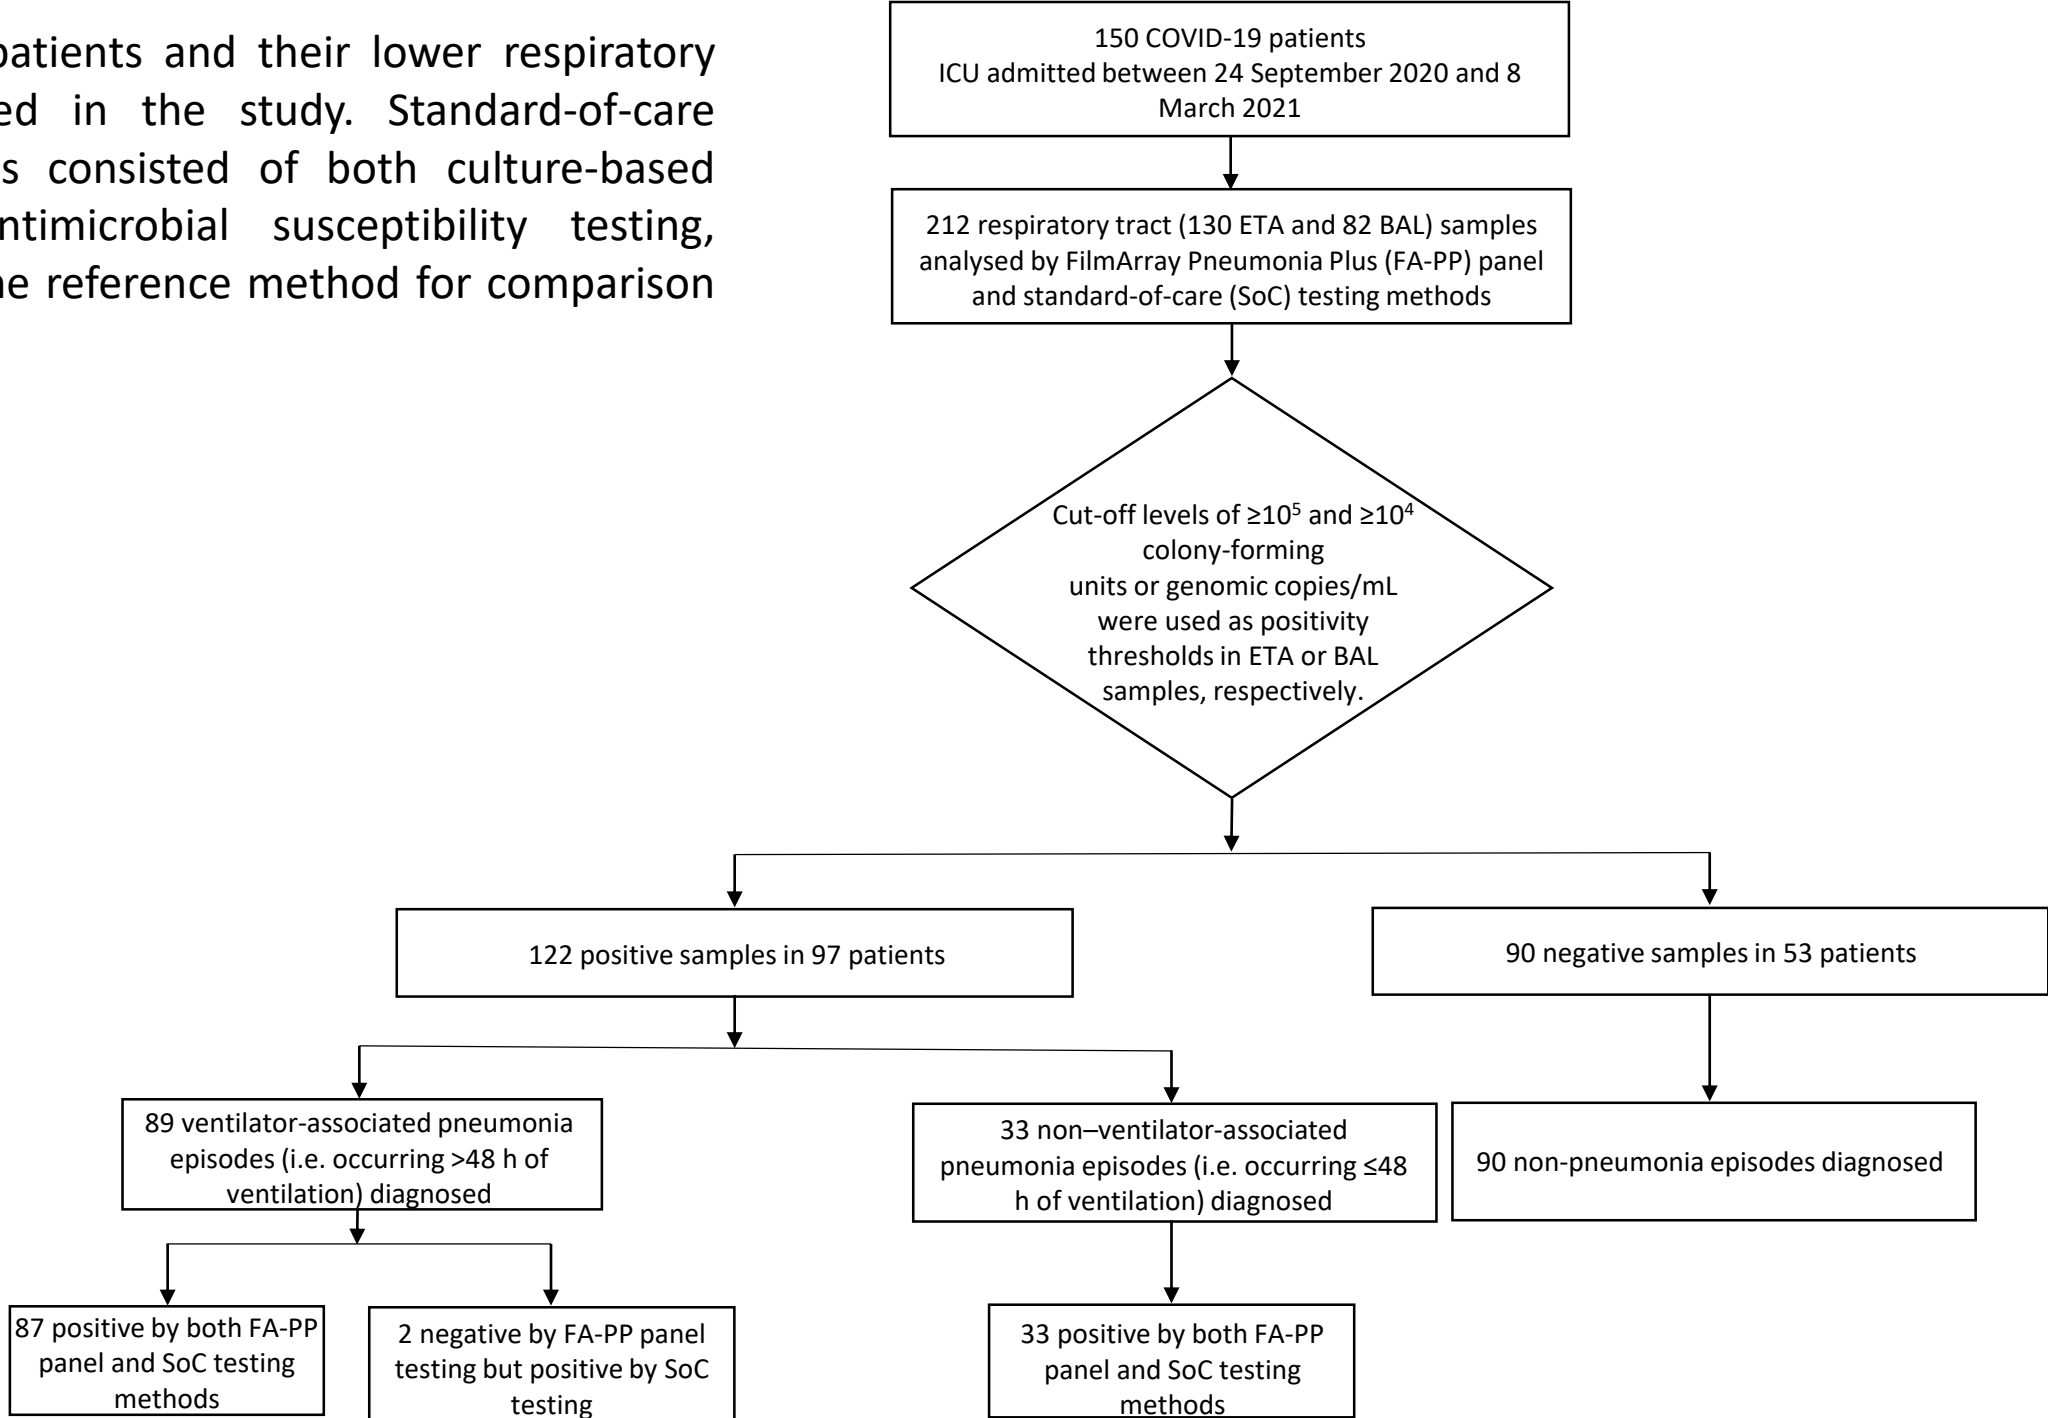

Supplement: spectrum00695-21_supp_1_seq8.pdf [file spectrum00695-21_supp_1_seq8.pdf]
